# Supplementary material for: Women’s experiences with unplanned pregnancy and abortion in Kenya: A qualitative study
Source: PubMed Central journal article supplement (PMC5784933; doi:10.1371/journal.pone.0191412), 2018-01-25
Supplement: pone.0191412.s001.pdf [file pone.0191412.s001.pdf]

## Self-Certification Form: Determining Whether Human Subjects Are Involved in Research When Obtaining Coded Private Information (Data) and/or Biological Specimens

**Instructions:**

1. Use this form if you need to provide funding agencies, administrators or collaborators with documentation that your research project does not require IRB review at UCSF. Keep a copy of the form in the PI's research file. Do **not** submit a copy to the IRB.
2. For help making this determination, review the Human Subjects Research Decision Tree and the Not Human Subjects Research guidance page. Contact the IRB at 415-476-1814 or IRB@ucsf.edu with questions.
3. Do not use this form for human stem cell research, which requires review by the GESCR Committee and may require IRB review.

| <b>Principal Investigator:</b>                                                                                                                                                                                                                                                                                                                                                                                                                                                                                                                                                                                                                                                                                                                                                                                                                                                                                                                                                                                                                    |                                                        |                                                              |
|---------------------------------------------------------------------------------------------------------------------------------------------------------------------------------------------------------------------------------------------------------------------------------------------------------------------------------------------------------------------------------------------------------------------------------------------------------------------------------------------------------------------------------------------------------------------------------------------------------------------------------------------------------------------------------------------------------------------------------------------------------------------------------------------------------------------------------------------------------------------------------------------------------------------------------------------------------------------------------------------------------------------------------------------------|--------------------------------------------------------|--------------------------------------------------------------|
| Name and Degree<br><b>Caitlin Gerdts, M.H.S., Ph.D.</b>                                                                                                                                                                                                                                                                                                                                                                                                                                                                                                                                                                                                                                                                                                                                                                                                                                                                                                                                                                                           | Institution<br>University of California, San Francisco | Department<br>Advancing New Standards in Reproductive Health |
| Mailing Address<br>1330 Broadway Suite 1100<br>Oakland, CA 94612                                                                                                                                                                                                                                                                                                                                                                                                                                                                                                                                                                                                                                                                                                                                                                                                                                                                                                                                                                                  | Phone Number<br>510 - 986 - 8967                       | E-mail Address<br>caitlin.gerdts@ucsf.edu                    |
| <b>Study/Grant Title/Award No.:</b>                                                                                                                                                                                                                                                                                                                                                                                                                                                                                                                                                                                                                                                                                                                                                                                                                                                                                                                                                                                                               |                                                        |                                                              |
| Aunty Jane Hotline Evaluation                                                                                                                                                                                                                                                                                                                                                                                                                                                                                                                                                                                                                                                                                                                                                                                                                                                                                                                                                                                                                     |                                                        |                                                              |
| <b>If your research meets the following conditions, the use of de-identified or coded private information (data) and/or biological specimens does not meet the definition of a human subject and does not require IRB review at UCSF:</b>                                                                                                                                                                                                                                                                                                                                                                                                                                                                                                                                                                                                                                                                                                                                                                                                         |                                                        |                                                              |
| 1. The research is not regulated by the Food and Drug Administration (FDA). <b>AND</b><br><br>2. No one on the UCSF research team has access to identifiable information and one or more of the following apply (check all applicable boxes):<br><br><input checked="" type="checkbox"/> The researcher(s) receive de-identified data or specimens.<br><br><input type="checkbox"/> The researcher(s) receive coded data or specimens AND one or more of the following apply:<br><div style="margin-left: 20px;"> <input type="checkbox"/> The key to decipher the code is destroyed before the research begins.<br/><br/> <input type="checkbox"/> The PI and holder of the key enter into an agreement prohibiting the release of the key under any circumstances. There are IRB-approved written policies for the repository or data management that prohibit the release of the key.<br/><br/> <input type="checkbox"/> There are other legal requirements prohibiting the release of the key under any circumstances.                 </div> |                                                        |                                                              |
| <b>Principal Investigator's Certification:</b>                                                                                                                                                                                                                                                                                                                                                                                                                                                                                                                                                                                                                                                                                                                                                                                                                                                                                                                                                                                                    |                                                        |                                                              |
| I certify that the information provided in this application is complete and correct.                                                                                                                                                                                                                                                                                                                                                                                                                                                                                                                                                                                                                                                                                                                                                                                                                                                                                                                                                              |                                                        |                                                              |
| <br>_____<br><b>Principal Investigator's Signature</b>                                                                                                                                                                                                                                                                                                                                                                                                                                                                                                                                                                                                                                                                                                                                                                                                                                                                                                         | 6/3/2015<br>_____<br><b>Date</b>                       |                                                              |
